# Supplementary material for: Impact of different soil solutions on the stability and photocatalytic activity of commercial zinc oxide nanoparticles
Source: Royal Society of Chemistry journal article supplement (doi:10.1039/d4en00354c), 2024-11-26
Supplement: d4en00354c1.pdf [file d4en00354c1.pdf]

## SUPPLEMENTARY FILE

### Impact of Different Soil Solutions on the Stability and Photocatalytic Activity of Commercial Zinc Oxide Nanoparticles

Karolina Solymos<sup>1,2</sup>, Eszter Kanász<sup>1</sup>, Áron Ágoston<sup>1,3</sup>, Tamás Gyulavári<sup>1</sup>, Benjámín Pálffy<sup>2</sup>,  
Ákos Szamosvölgyi<sup>1</sup>, Ákos Kukovecz<sup>1</sup>, Zoltán Kónya<sup>1</sup>, Zsolt Pap<sup>1,4,5\*</sup>

<sup>1</sup>Department of Applied and Environmental Chemistry, University of Szeged, Rerrich B. Sqr. 1, Szeged, HU-6720, Hungary

<sup>2</sup>Department of Geoinformatics, Physical and Environmental Geography, University of Szeged, Egyetem Str. 2–6, Szeged, HU-6722, Hungary

<sup>3</sup>Department of Physical Chemistry and Materials Sciences, University of Szeged, Rerrich B. Sqr.1, Szeged, HU-6720, Hungary

<sup>4</sup>Nanostructured Materials and Bio-Nano-Interfaces Center, Institute for Interdisciplinary Research on Bio-Nano-Sciences, Babeş–Bolyai University, Treboniu Laurian Str. 42, Cluj-Napoca, RO-400271, Romania

<sup>5</sup>Institute of Research-Development-Innovation in Applied Natural Sciences, Babeş–Bolyai University, Treboniu Laurian Str. 42, Cluj-Napoca, RO-400271, Romania

Corresponding author: pzsolt@chem.u-szeged.hu

## 2. Materials and methods

### 2.2. Soil sampling and analysis

Soil sampling involved collecting 10 Regosol, 10 Chernozem, and 10 Solonetz topsoil samples from three different locations. The Regosol samples were taken from a forest near Tallya, Hungary, the Chernozems from an agricultural land near Szeged, Hungary, and the Solonetz samples from a meadow near Szatymaz, Hungary (Figure S1). The sampling was done in September 2021 and January 2022, from 0–20 cm depths. The topsoil samples from the 0–10 cm and 10–20 cm layers were mixed. After air drying for 10 days, the soil samples were sieved using a 2 mm diameter pore-sized sieve. The soil parameters, such as pH, electrical conductivity ( $E_c$ ), total salt content, texture, and organic matter content, were determined following the Hungarian Standards (MSZ).

The pH values of the soil samples were measured using a digital pH meter (Inolab pH 720) after mixing them with deionized water in a ratio of 1:2.5<sup>1</sup>. Soil textures were evaluated based on the plasticity index values according to Arany (Arany plasticity index). The index is calculated from the amount (cm<sup>3</sup>) of deionized water added to an air-dry soil sample (100 g) until reaching the upper limit of its plasticity, which is the moisture content at which a fine-grained soil can no longer be remolded without cracking. Ec values and total salt contents were analyzed with an Orion 3-Star conductivity meter (Thermo Electron Corporation) for water-saturated soil samples ( $\pm 10 \mu\text{S}\cdot\text{cm}^{-1}$ ).<sup>1-3</sup>

OM contents were determined using a UV–vis spectrophotometer (Spectronic Helios- $\gamma$ , Thermo Fisher Scientific) after oxidation of the organic matter with 0.33 M K<sub>2</sub>Cr<sub>2</sub>O<sub>7</sub> in the presence of 95% H<sub>2</sub>SO<sub>4</sub> overnight. As a result, the organic carbon content of the soil sample was oxidized, while Cr<sup>6+</sup> ions were reduced to Cr<sup>3+</sup> ions. The concentration of Cr<sup>3+</sup> ions was measured at a wavelength of 590 nm, which is directly proportional to the organic carbon content.<sup>4</sup>

To determine the concentration of different major and trace elements (Na, K, Ca, Mg, Al, Fe, Mn, Zn, Cu, Ni, Co, As), we weighed 0.5 g of samples into a perfluoroalkoxy vessel, followed by the addition of 7 mL of aqua regia (HNO<sub>3</sub>/HCl = 1:3). Soil samples were digested in a microwave oven (Anton Paar Multiwave 3000). Element concentrations in the digested samples were determined by ICP-OES (Optima 7000 DV, PerkinElmer) with a standard deviation of  $\pm 10\%$ .<sup>2, 3, 5, 6</sup>

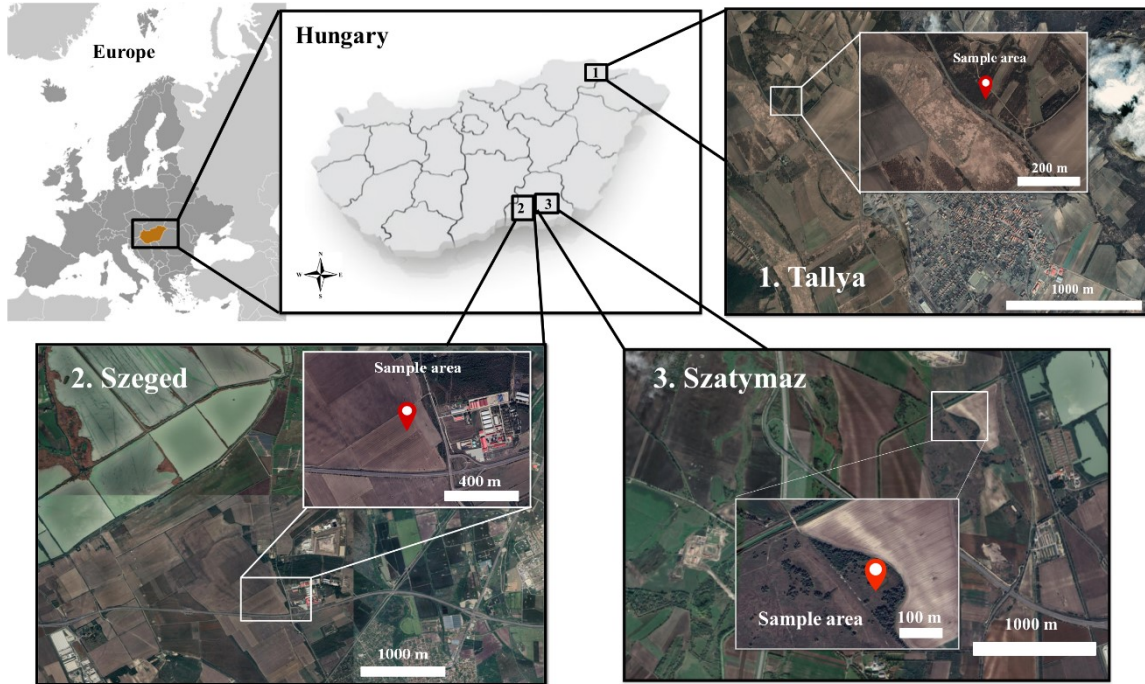

**Figure S1.** Location of the sample areas

### 2.3. Soil solution preparation and analysis

**Determination of COD.** Determination of COD. The exact concentration of a 0.002 M potassium permanganate solution was determined. To prepare the oxalic acid solution, 0.6303 g of  $(\text{COOH})_2 \cdot 2\text{H}_2\text{O}$  was weighed out and slightly diluted with  $\text{H}_2\text{SO}_4$  (1:15). The resulting solution was then quantitatively washed into a volumetric flask and made up to the mark. The concentration of the prepared solution was approximately 0.05 M, and the exact concentration was calculated from the actual measured mass. The 0.005 M oxalic acid measuring solution for titration was obtained from this solution through a tenfold dilution. In the Erlenmeyer flask, 20 cm<sup>3</sup> of the 0.005 M oxalic acid solution was measured from a burette and 5 cm<sup>3</sup> of a 1:2 dilution of  $\text{H}_2\text{SO}_4$  was added. The solution was heated to 80-90 °C and titrated while hot with 0.002 M  $\text{KMnO}_4$  until the solution turned pale pink. The exact concentration of the potassium permanganate solution consumed during the titration was calculated based on the volume of oxalic acid measuring solution used. The chemical oxygen demand for the water sample was determined. A 500 cm<sup>3</sup> volumetric flask was used, and an unknown quantity of the user-prepared 0.05 M oxalic acid solution was added, making up to the mark. 100 cm<sup>3</sup> of the resulting solution was transferred into a 300 cm<sup>3</sup> Erlenmeyer flask, and then 5 cm<sup>3</sup> of a 1:2 dilution of sulphuric acid and a few pieces of pumice were added. The solution was brought to a boil, and while boiling, 20 cm<sup>3</sup> of the 0.002 M potassium permanganate measuring solution was added. The solution was boiled for exactly 10 minutes (strictly observing the boiling time was crucial). Finally, the boiling process was stopped. In the determination, the substances in the water were reacted with known amounts of potassium permanganate. The excess oxidizing agent was then oxidized with a known amount of potassium hydroxide, and oxalic acid was added to the remaining oxidizing agent. The excess oxalic acid was then titrated back with the  $\text{KMnO}_4$  solution. Thus, the determination of the total oxidizing agent ( $\text{KMnO}_4$ ) was calculated from the 20 cm<sup>3</sup> consumed in the back titration. Meanwhile, the total reducing agent ( $(\text{COOH})_2$ ) represents the oxidizable organic matter content of the sample + 20 cm<sup>3</sup>. The average of the consumptions obtained by titration of the water sample must be subtracted from the consumption obtained for the blank test to calculate the COD <sup>7, 86, 76, 76, 76, 75, 64, 5</sup>(260-16, 1967b)<sup>8777765</sup>.

### 3. Results and discussion

### 3.1. Properties of soil solutions and their possible effects on ZnO NPs

**Table S1.**

Basic parameters of the soil samples

| <b>Sample</b> | <b>pH (H<sub>2</sub>O)</b> | <b>OM (%)</b> | <b>Ec (μS·cm<sup>-1</sup>)</b> | <b>Texture</b> |
|---------------|----------------------------|---------------|--------------------------------|----------------|
| <b>REG1</b>   | 4.79                       | 4.92          | 289                            | Loamy          |
| <b>REG2</b>   | 4.53                       | 7.32          | 285                            | Loamy          |
| <b>REG3</b>   | 4.87                       | 7.76          | 251.7                          | Clay Loamy     |
| <b>REG4</b>   | 4.68                       | 5.04          | 238.3                          | Sandy Loam     |
| <b>REG5</b>   | 4.61                       | 7.1           | 180.1                          | Clay Loamy     |
| <b>REG6</b>   | 4.56                       | 3.56          | 250.7                          | Loamy          |
| <b>REG7</b>   | 4.42                       | 8.6           | 246                            | Clay Loamy     |
| <b>REG8</b>   | 4.62                       | 5.72          | 270                            | Clay Loamy     |
| <b>REG9</b>   | 4.87                       | 4.52          | 250                            | Loamy          |
| <b>REG10</b>  | 4.73                       | 6             | 296.7                          | Clay Loamy     |
| <b>CH1</b>    | 7.86                       | 1.94          | 538                            | Sandy Loam     |
| <b>CH2</b>    | 7.82                       | 2.42          | 471                            | Sandy Loam     |
| <b>CH3</b>    | 7.82                       | 3.16          | 665                            | Sandy Loam     |
| <b>CH4</b>    | 7.81                       | 3.1           | 670                            | Sandy Loam     |
| <b>CH5</b>    | 7.84                       | 2.84          | 591                            | Sandy Loam     |
| <b>CH6</b>    | 7.9                        | 3.22          | 482                            | Sandy Loam     |
| <b>CH7</b>    | 7.78                       | 2.42          | 621                            | Loam           |
| <b>CH8</b>    | 7.81                       | 2.72          | 542                            | Sandy Loam     |
| <b>CH9</b>    | 7.77                       | 2.58          | 717                            | Loam           |
| <b>CH10</b>   | 7.74                       | 2.7           | 715                            | Sandy Loam     |
| <b>SOL1</b>   | 9,75                       | 1,46          | 1182                           | Sand           |
| <b>SOL2</b>   | 10,07                      | 0,84          | 1310                           | Sand           |
| <b>SOL3</b>   | 10,04                      | 1             | 1872                           | Sand           |

|              |      |      |      |             |
|--------------|------|------|------|-------------|
| <b>SOL4</b>  | 9,88 | 0,36 | 1601 | Sand        |
| <b>SOL5</b>  | 9,89 | 1    | 2124 | Sand        |
| <b>SOL6</b>  | 10,2 | 1,2  | 3054 | Sand        |
| <b>SOL7</b>  | 9,89 | 0,74 | 2021 | Coarse Sand |
| <b>SOL8</b>  | 9,9  | 0,82 | 1732 | Coarse Sand |
| <b>SOL9</b>  | 9,64 | 1    | 1692 | Sand        |
| <b>SOL10</b> | 9,89 | 0,9  | 2633 | Sandy Loam  |

**Table S2**

Physicochemical properties of the soil solutions

| <b>Samples</b> | <b>pH</b>      | <b>IS<br/>(mmol·L<sup>-1</sup>)</b> | <b>COD<br/>(mg·L<sup>-1</sup>)</b> |
|----------------|----------------|-------------------------------------|------------------------------------|
| <b>CH1</b>     | 7.76 ± 0.1     | 3.38 ± 0.1                          | 20.5 ± 0.3                         |
| <b>CH2</b>     | 7.72 ± 0.3     | 3.39 ± 0.1                          | 21.3 ± 0.5                         |
| <b>CH3</b>     | 7.71 ± 0.1     | 4.12 ± 0.1                          | 20.6 ± 0.2                         |
| <b>CH4</b>     | 7.79 ± 0.4     | 4.59 ± 0.1                          | 21.2 ± 0.5                         |
| <b>CH5</b>     | 7.69 ± 0.1     | 3.86 ± 0.1                          | 20.6 ± 0.4                         |
| <b>CH6</b>     | 7.72 ± 0.1     | 3.19 ± 0.08                         | 20.4 ± 0.3                         |
| <b>CH7</b>     | 7.75 ± 0.2     | 4.15 ± 0.1                          | 21.0 ± 0.4                         |
| <b>CH8</b>     | 7.74 ± 0.2     | 3.42 ± 0.05                         | 20.7 ± 0.3                         |
| <b>CH9</b>     | 7.81 ± 0.5     | 4.62 ± 0.09                         | 21.1 ± 0.4                         |
| <b>CH10</b>    | 7.73 ± 0.2     | 4.84 ± 0.1                          | 20.8 ± 0.3                         |
| <b>CHALL*</b>  | 7.74 ± 0.2     | 3.96 ± 0.2                          | 20.9 ± 0.4                         |
| <b>REG1</b>    | 4.85 ±<br>0.08 | 1.89 ± 0.08                         | 163.8 ± 3.4                        |

|                |             |              |             |
|----------------|-------------|--------------|-------------|
| <b>REG2</b>    | 5.05 ± 0.12 | 2.09 ± 0.12  | 166.1 ± 2.9 |
| <b>REG3</b>    | 4.87 ± 0.06 | 2.04 ± 0.09  | 159.3 ± 3.6 |
| <b>REG4</b>    | 5.10 ± 0.15 | 1.93 ± 0.08  | 168.4 ± 3.2 |
| <b>REG5</b>    | 5.02 ± 0.1  | 2.01 ± 0.1   | 160.6 ± 2.8 |
| <b>REG6</b>    | 4.94 ± 0.08 | 2.11 ± 0.15  | 167.2 ± 3.9 |
| <b>REG7</b>    | 4.98 ± 0.13 | 1.91 ± 0.06  | 161.9 ± 2.3 |
| <b>REG8</b>    | 4.92 ± 0.11 | 2.02 ± 0.13  | 164.7 ± 3.7 |
| <b>REG9</b>    | 5.00 ± 0.09 | 1.94 ± 0.07  | 165.3 ± 4.1 |
| <b>REG10</b>   | 4.90 ± 0.07 | 1.96 ± 0.11  | 162.5 ± 2.6 |
| <b>REGALL*</b> | 4.95 ± 0.1  | 1.99 ± 0.1   | 165 ± 1.2   |
| <b>SOL1</b>    | 9.1 ± 0.3   | 12.36 ± 0.26 | 201 ± 0.6   |
| <b>SOL2</b>    | 9.5 ± 0.25  | 12.33 ± 0.28 | 219.9 ± 1.1 |
| <b>SOL3</b>    | 9.2 ± 0.22  | 11.73 ± 0.25 | 187.1 ± 3.5 |
| <b>SOL4</b>    | 9.7 ± 0.18  | 11.9 ± 0.27  | 196.4       |
| <b>SOL5</b>    | 9.3 ± 0.21  | 12.12 ± 0.29 | 214.5 ± 0.9 |
| <b>SOL6</b>    | 9.6 ± 0.23  | 11.74 ± 0.24 | 193.6 ± 5.1 |
| <b>SOL7</b>    | 9.0 ± 0.28  | 12.40 ± 0.23 | 208.3 ± 1.3 |
| <b>SOL8</b>    | 9.4 ± 0.19  | 11.98 ± 0.27 | 220.1 ± 5.6 |
| <b>SOL9</b>    | 9.1 ± 0.27  | 12.27 ± 0.25 | 218.7 ± 3.7 |

|                |            |              |             |
|----------------|------------|--------------|-------------|
| <b>SOL10</b>   | 9.5 ± 0.24 | 12.01 ± 0.28 | 198.8 ± 0.4 |
| <b>SOLALL*</b> | 9.4 ± 0.2  | 12.03 ± 0.3  | 227.2 ± 1.6 |

**CHALL\*** - a homogeneous sample that was formed by combining the 10 Chernozem soil solution samples

**REGALL\*** - a homogeneous sample that was formed by combining the 10 Regosol soil solution samples

**SOLALL\*** - a homogeneous sample that was formed by combining the 10 Solonetz soil solution samples



### 3.2. Crystal structure, morphology and optical properties of ZnO NPs

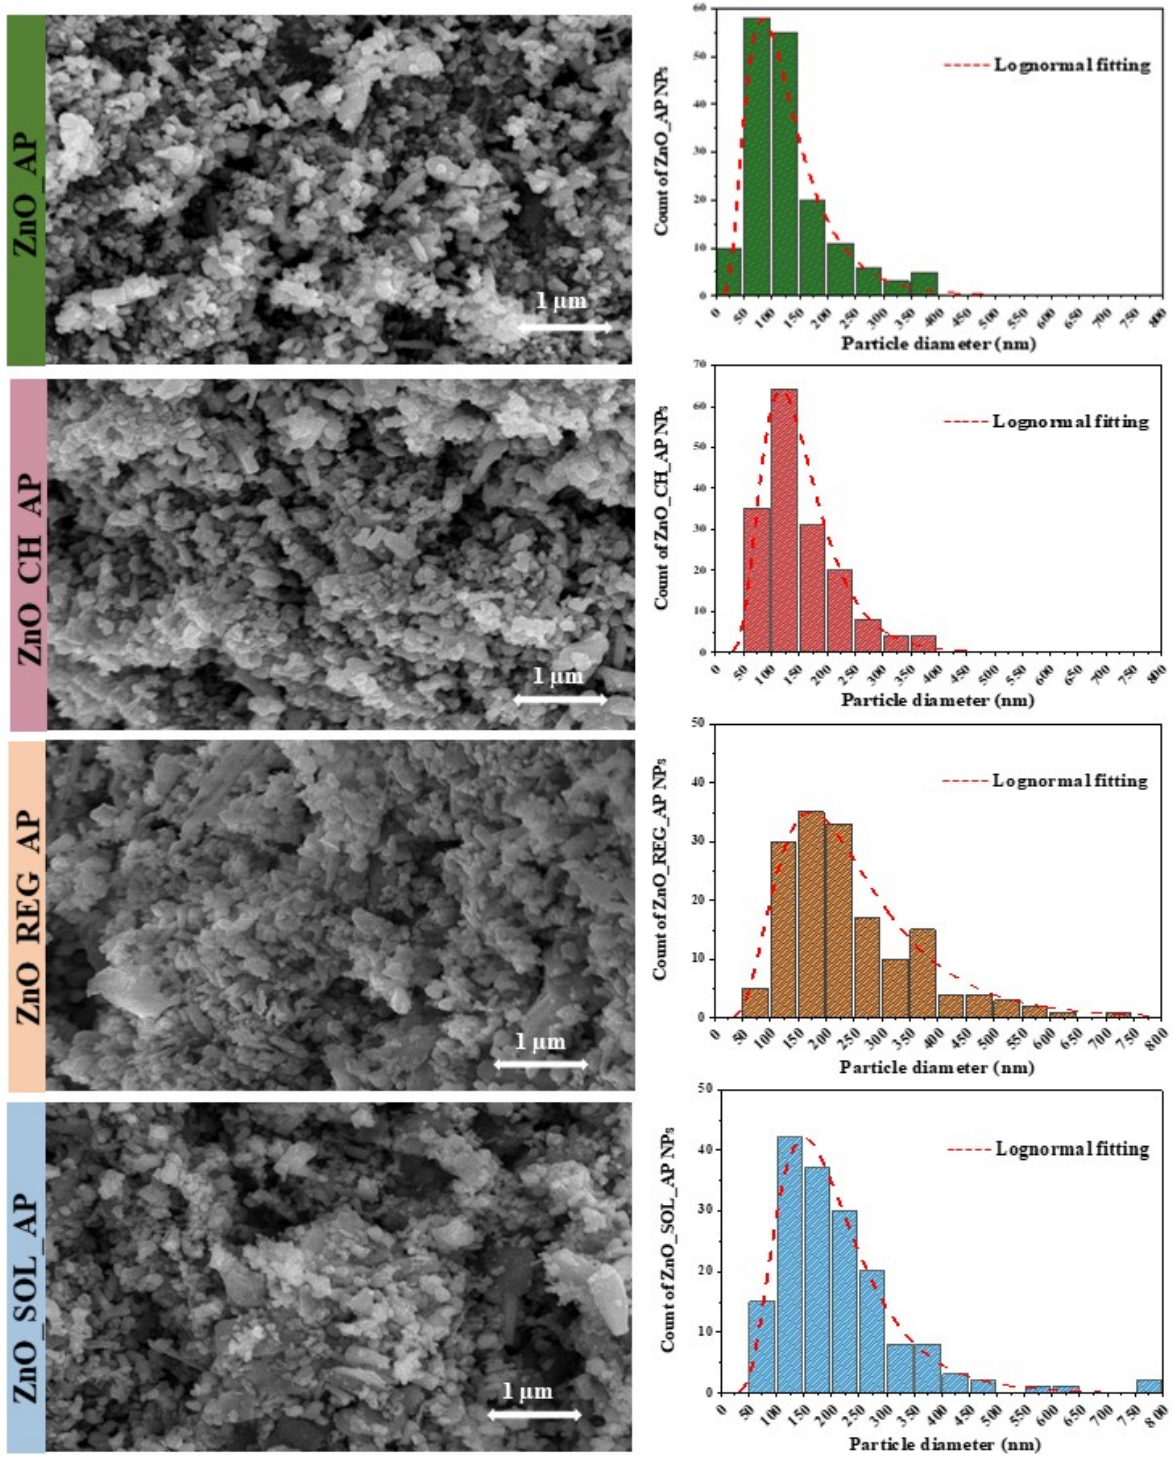

Figure S2. SEM micrographs of ZnO NP samples after phenol degradation and after immersion in soil solution, and their corresponding size distribution histograms.

**Table S3.**

Bandgap values of the samples

| Sample name       | Bandgap (eV) |
|-------------------|--------------|
| <i>ZnO_REF</i>    | 3.12         |
| <i>ZnO_AP</i>     | 3.09         |
| <i>ZnO_CH</i>     | 3.06         |
| <i>ZnO_CH_AP</i>  | 3.17         |
| <i>ZnO_REG</i>    | 3.09         |
| <i>ZnO_REG_AP</i> | 3.16         |
| <i>ZnO_SOL</i>    | 3.04         |
| <i>ZnO_SOL_AP</i> | 3.04         |

### 3.3. Surface properties of ZnO NPs

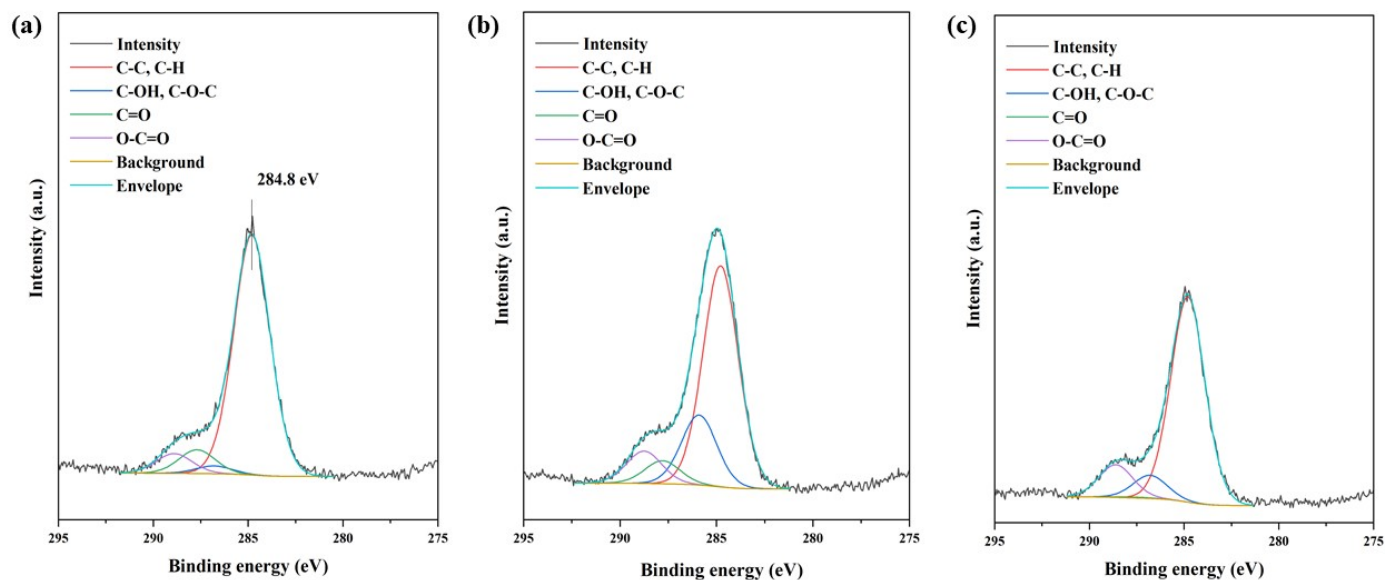

**Figure S3.** C 1S XPs spectra of the ZnO samples: **a)** ZnO\_CH, **b)** ZnO\_REG, **c)** ZnO\_SOL.

### References

1. MSZ-08-0206-2, Journal, 1978.

2. N. T. H. Pham, I. Babcsányi, P. Balling and A. Farsang, *Journal of Soils and Sediments*, 2022, **22**, 2671-2689.
3. N. T. H. Pham, I. Babcsányi and A. Farsang, *Environmental Geochemistry and Health*, 2022, **44**, 1893-1909.
4. MSZ-21470-52, *Journal*, 1983.
5. MSZ-21470-50, *Journal*, 2006.
6. Z. Szolnoki, A. Farsang and I. Puskás, *Environmental Pollution*, 2013, **177**, 106-115.
7. M. 260-16, *Journal*, 1967, **MSZ 260-16**
